# Supplementary material
Source: publisher figshare collection journal article supplement (https://acs.figshare.com/ndownloader/files/5815818)
Supplement: Supplementary file 1 [file 5815818]

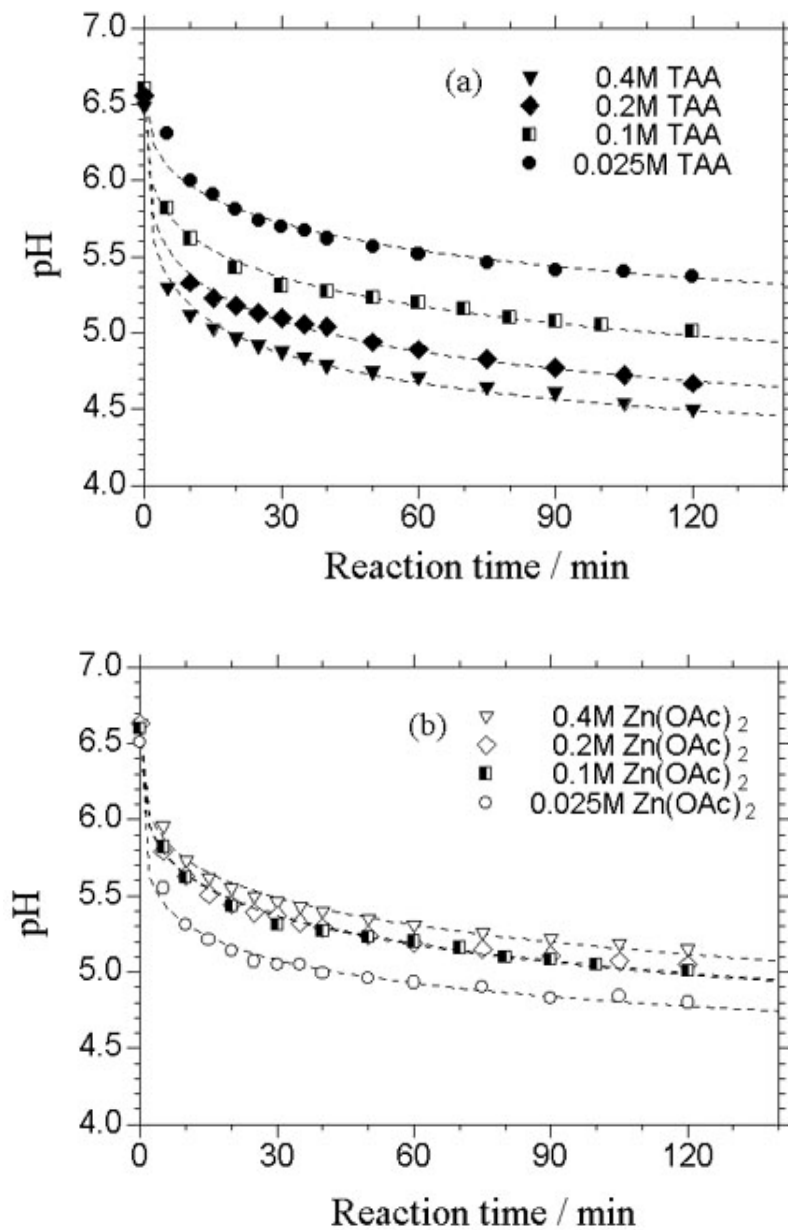

Figure 1S. The change of pH in the solutions with reaction time. The reaction was carried out at 70 °C.

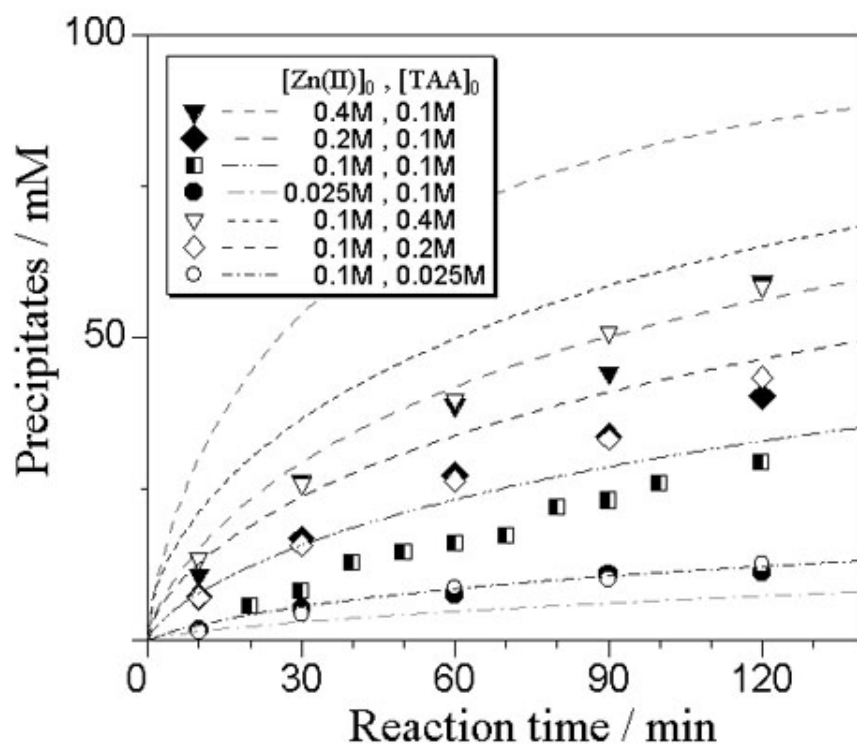

Figure 2S. Comparison of the amounts of ZnS precipitates ( $P_t$ ) plotted versus reaction time (same as shown in Figure 2) to the theoretically calculated curves obtained by applying eq. A8 (see text in Appendix (ii) for detail).

**Table 1S**

Table 1S. Rate constants for ZnS precipitation determined for eq. 1, by fitting eq. 2 with the experimental data at various reaction temperatures. (See Appendix for detail)

| Temperature / °C | $10^3 \times k / (\text{mol l}^{-1})^{1-2n} \text{ min}^{-1}$ |
|------------------|---------------------------------------------------------------|
| 50               | 2.01                                                          |
| 60               | 3.52                                                          |
| 70               | 5.66                                                          |
| 80               | 10.03                                                         |
| 90               | 18.14                                                         |
